# Supplementary material for: Genomewide Association Study of Simvastatin Pharmacokinetics
Source: PubMed Central journal article supplement — Clin Pharmacol Ther. 2022 Jun 24;112(3):676–86. doi: 10.1002/cpt.2674 (PMC9540481; doi:10.1002/cpt.2674), 2022-06-24
Supplement: CPT-112-676-s004.pdf [file CPT-112-676-s004.pdf]

# A *SLCO1B1*

|                        |     | Nucleotide variation |          |          |           |                        |
|------------------------|-----|----------------------|----------|----------|-----------|------------------------|
|                        |     | c.388A>G             | c.463C>A | c.521T>C | c.1929A>C | CPIC clinical function |
| Haplotype <sup>1</sup> | *1  | A                    | C        | T        | A         | normal                 |
|                        | *5  | A                    | C        | C        | A         | no function            |
|                        | *14 | G                    | A        | T        | A         | increased              |
|                        | *15 | G                    | C        | C        | A         | no function            |
|                        | *20 | G                    | C        | T        | C         | increased              |
|                        | *37 | G                    | C        | T        | A         | normal                 |

# B

| OATP1B1 phenotype         | Genotype                                                          | <i>SLCO1B1</i> diplotype                                         |
|---------------------------|-------------------------------------------------------------------|------------------------------------------------------------------|
| Highly increased function | Two increased function haplotypes                                 | *14/*14, *14/*20, *20/*20                                        |
| Increased function        | Increased function haplotype with normal function haplotype       | *1/*14, *1/*20, *14/*37, *20/*37                                 |
| Normal function           | Two normal function haplotypes                                    | *1/*1, *1/*37, *37/*37                                           |
| Decreased function        | No function haplotype with normal or increased function haplotype | *1/*5, *1/*15, *5/*14, *5/*20, *5/*37, *14/*15, *15/*20, *15/*37 |
| Poor function             | Two no function haplotypes                                        | *5/*5, *5/*15, *15/*15                                           |

**Figure S1.** Definition of *SLCO1B1* haplotypes and their functionalities (A), and assignment of OATP1B1 phenotype based on *SLCO1B1* diplotype (B).

CPIC, Clinical Pharmacogenetic Implementation Consortium; OATP1B1, organic anion transporting polypeptide 1B1

<sup>1</sup>*SLCO1B1*\*1 was previously known as \*1A, \*20 was previously known as \*35, and *SLCO1B1*\*37 was previously known as \*1B.
